# Supplementary material for: Revealing transport kinetics for efficient electrochemical conversion of captured CO2 in amine solutions
Source: Royal Society of Chemistry journal article supplement (doi:10.1039/d6sc00859c), 2026-05-01
Supplement: d6sc00859c1.pdf [file d6sc00859c1.pdf]

## Supporting Information

# Revealing Transport Kinetics for Efficient Electrochemical Conversion of Captured CO<sub>2</sub> in Amine Solutions

Zhihui Lv,<sup>a</sup> Kang Liu,<sup>b</sup> Chun-Qing Yin,<sup>a</sup> Lin Du,<sup>a</sup> Min Liu,<sup>\*bc</sup> Xin-Ming Hu<sup>\*ad</sup>

<sup>a</sup> Environment Research Institute, Shandong University, Qingdao 266237, China.

<sup>b</sup> Hunan Joint International Research Center for Carbon Dioxide Resource Utilization, State Key Laboratory of Powder Metallurgy, School of Physics and Electronics, Central South University, Changsha 410083, China.

<sup>c</sup> School of Metallurgy and Environment, Central South University, Changsha 410083, China.

<sup>d</sup> Shandong Key Laboratory of Environmental Processes and Health, Shandong University, Qingdao 266237, China

\* Corresponding authors. E-mail: minliu@csu.edu.cn; huxm@sdu.edu.cn

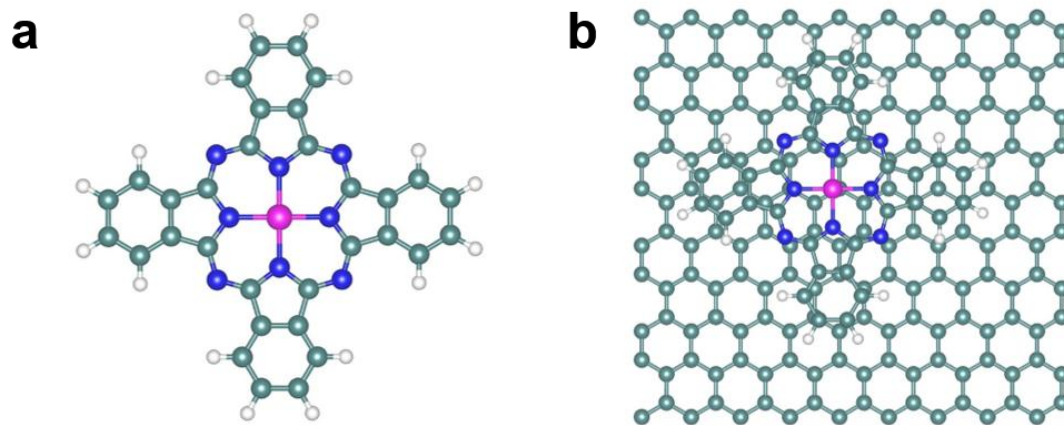

**Figure S1.** The structures of (a) CoPc and (b) CoPc/CB for DFT calculations. The green, blue, pink, and white balls denote C, N, Co, and H atoms, respectively.

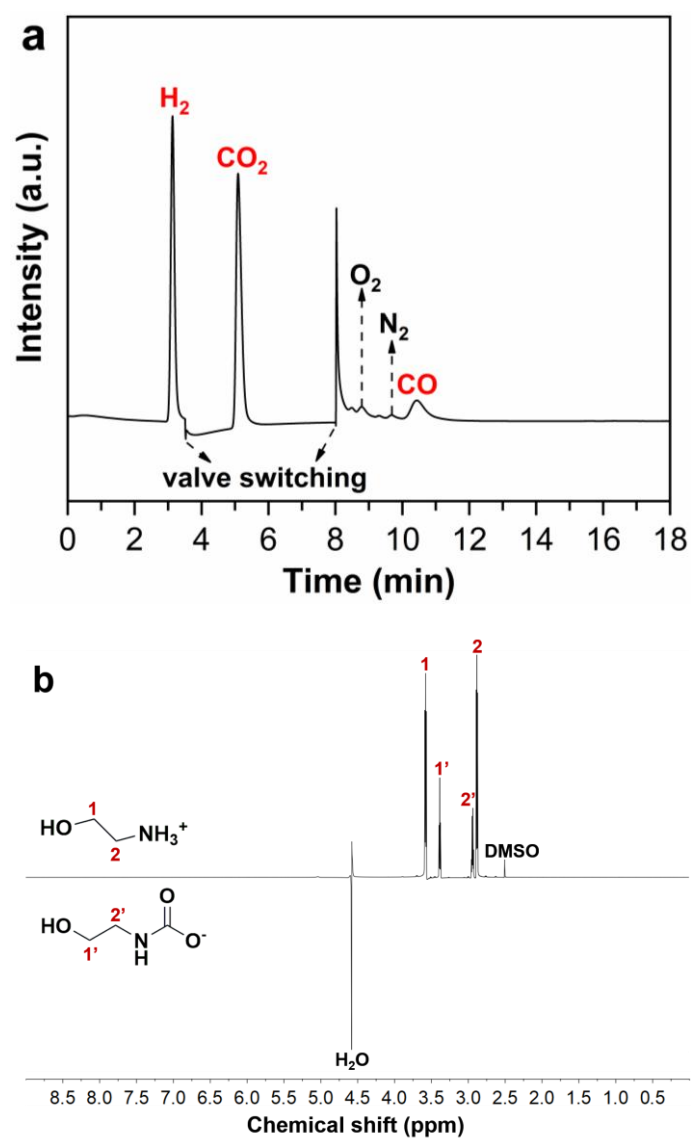

**Figure S2.** (a) Gas chromatogram of the gaseous products and (b)  $^1\text{H}$  NMR spectrum of the electrolyte solution after electrolysis of  $\text{CO}_2$ -loaded 2 M MEA at  $-0.85$  V vs RHE for 15 min using CoPc/CB catalyst. Since the concentration of MEA-derived species is too high, the electrolyte is diluted with ultrapure water for 10 times before  $^1\text{H}$  NMR measurement.

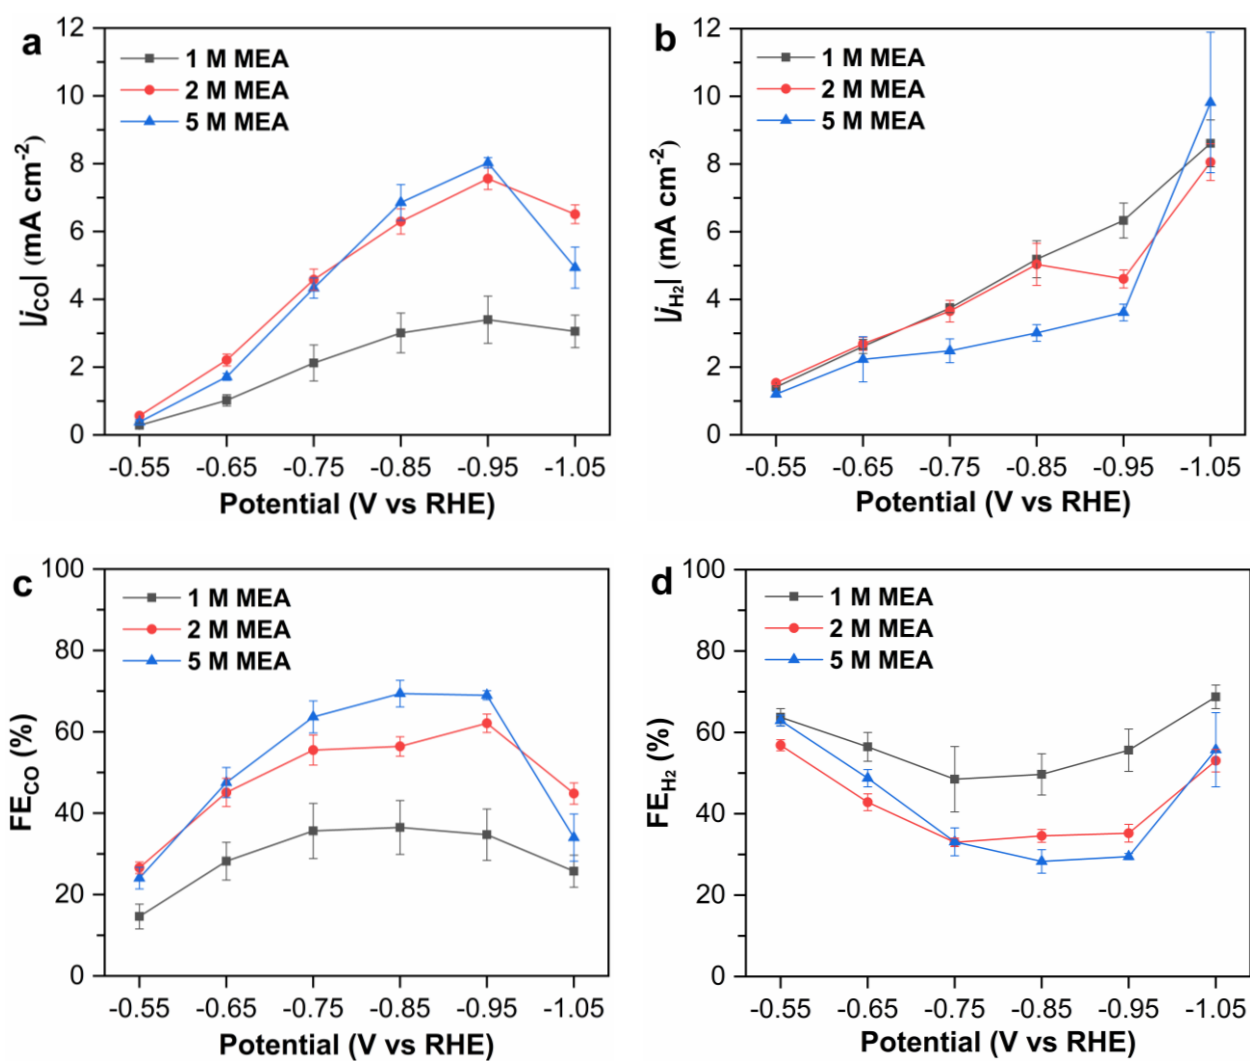

**Figure S3.** (a)  $|j_{CO}|$ , (b)  $|j_{H_2}|$ , (c) FE<sub>CO</sub>, and (d) FE<sub>H<sub>2</sub></sub> recorded for the electrolysis of captured CO<sub>2</sub> in MEA solutions of varying concentrations using CoPc/CB catalyst.

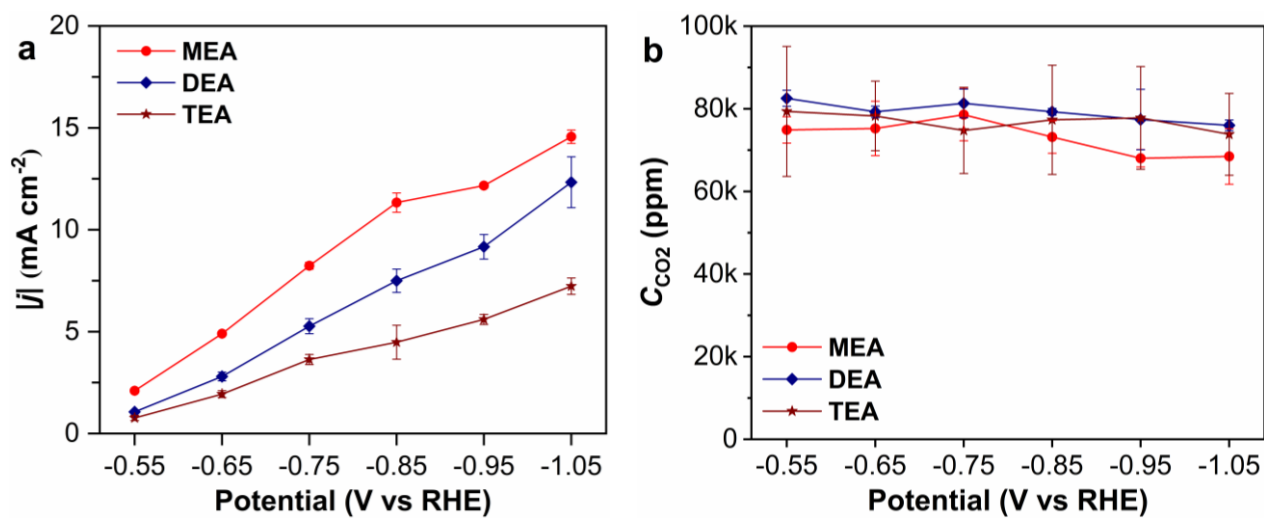

**Figure S4.** (a)  $|j|$  and (b) concentrations of CO<sub>2</sub> in the headspace recorded for the electrolysis of CO<sub>2</sub>-loaded 2 M MEA, DEA, and TEA solutions using CoPc/CB catalyst.

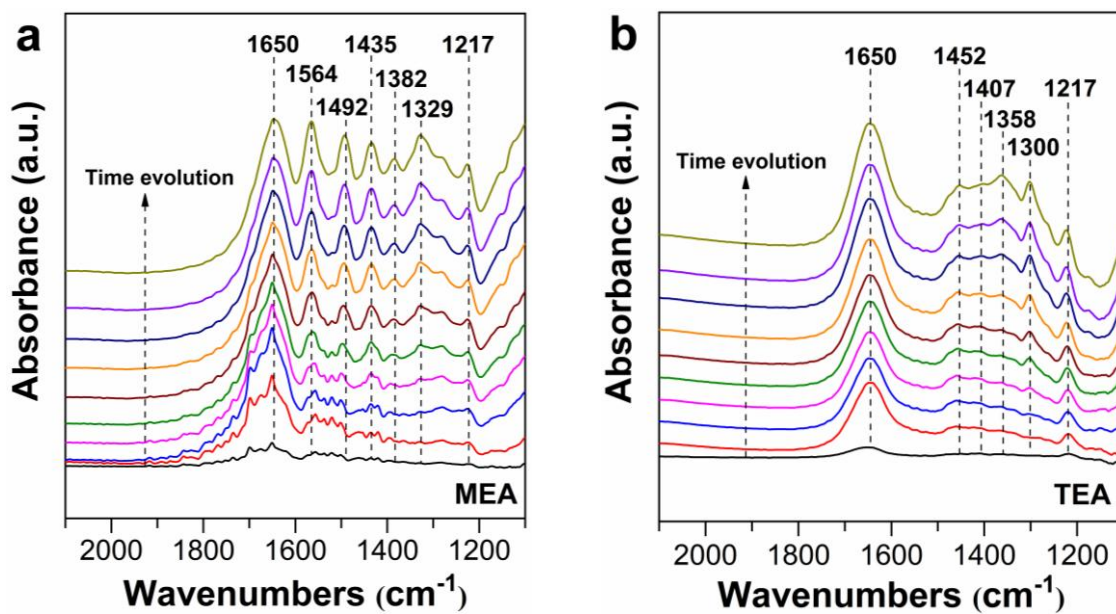

**Figure S5.** *In-situ* ATR-FTIR recorded during the process of CO<sub>2</sub> capture in 2 M (a) MEA and (b) TEA solutions for 30 min.

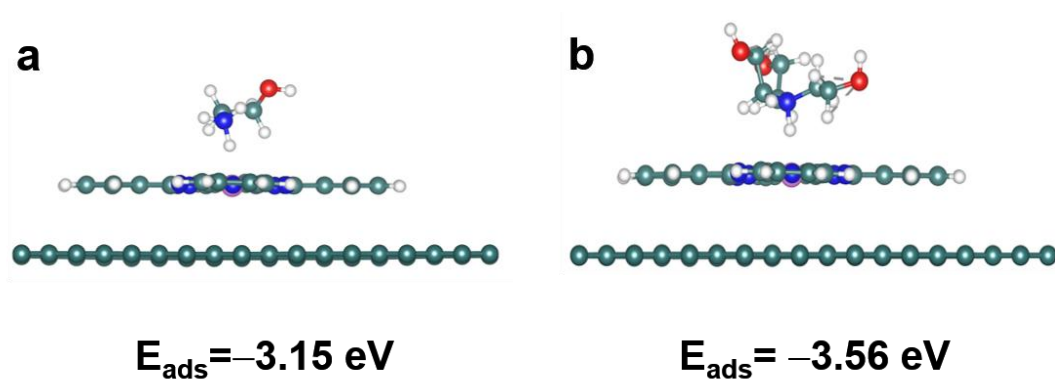

**Figure S6.**  $E_{\text{ads}}$  of (a) MEA- $\text{H}^+$  and (b) TEA- $\text{H}^+$  on the Co active site. The green, blue, red, and white balls denote C, N, O, and H atoms, respectively.

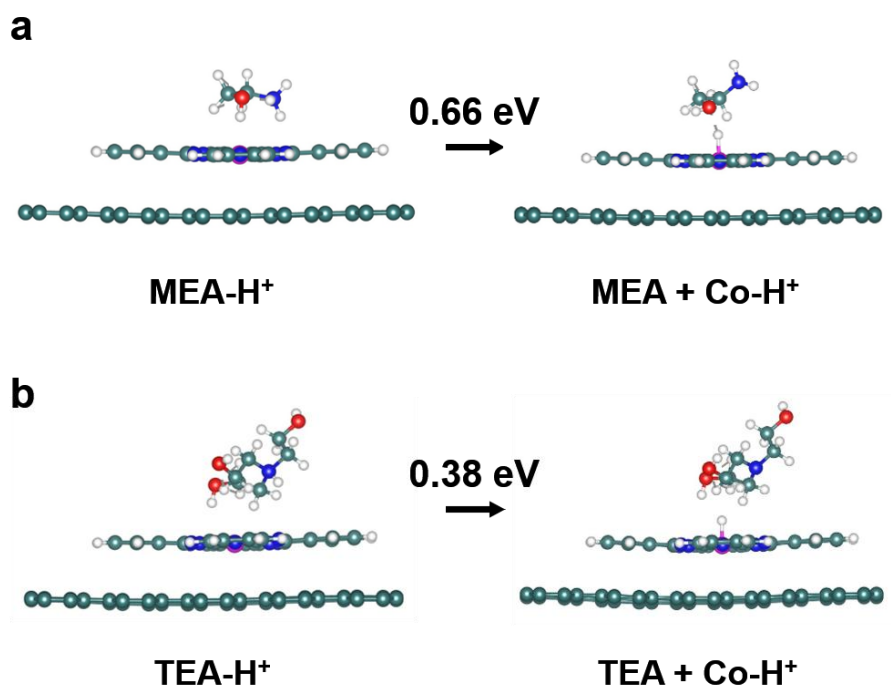

**Figure S7.** The energy required for H transferred from (a) MEA-H<sup>+</sup> and (b) TEA-H<sup>+</sup> to the Co active site. The green, blue, red, and white balls denote C, N, O, and H atoms, respectively.

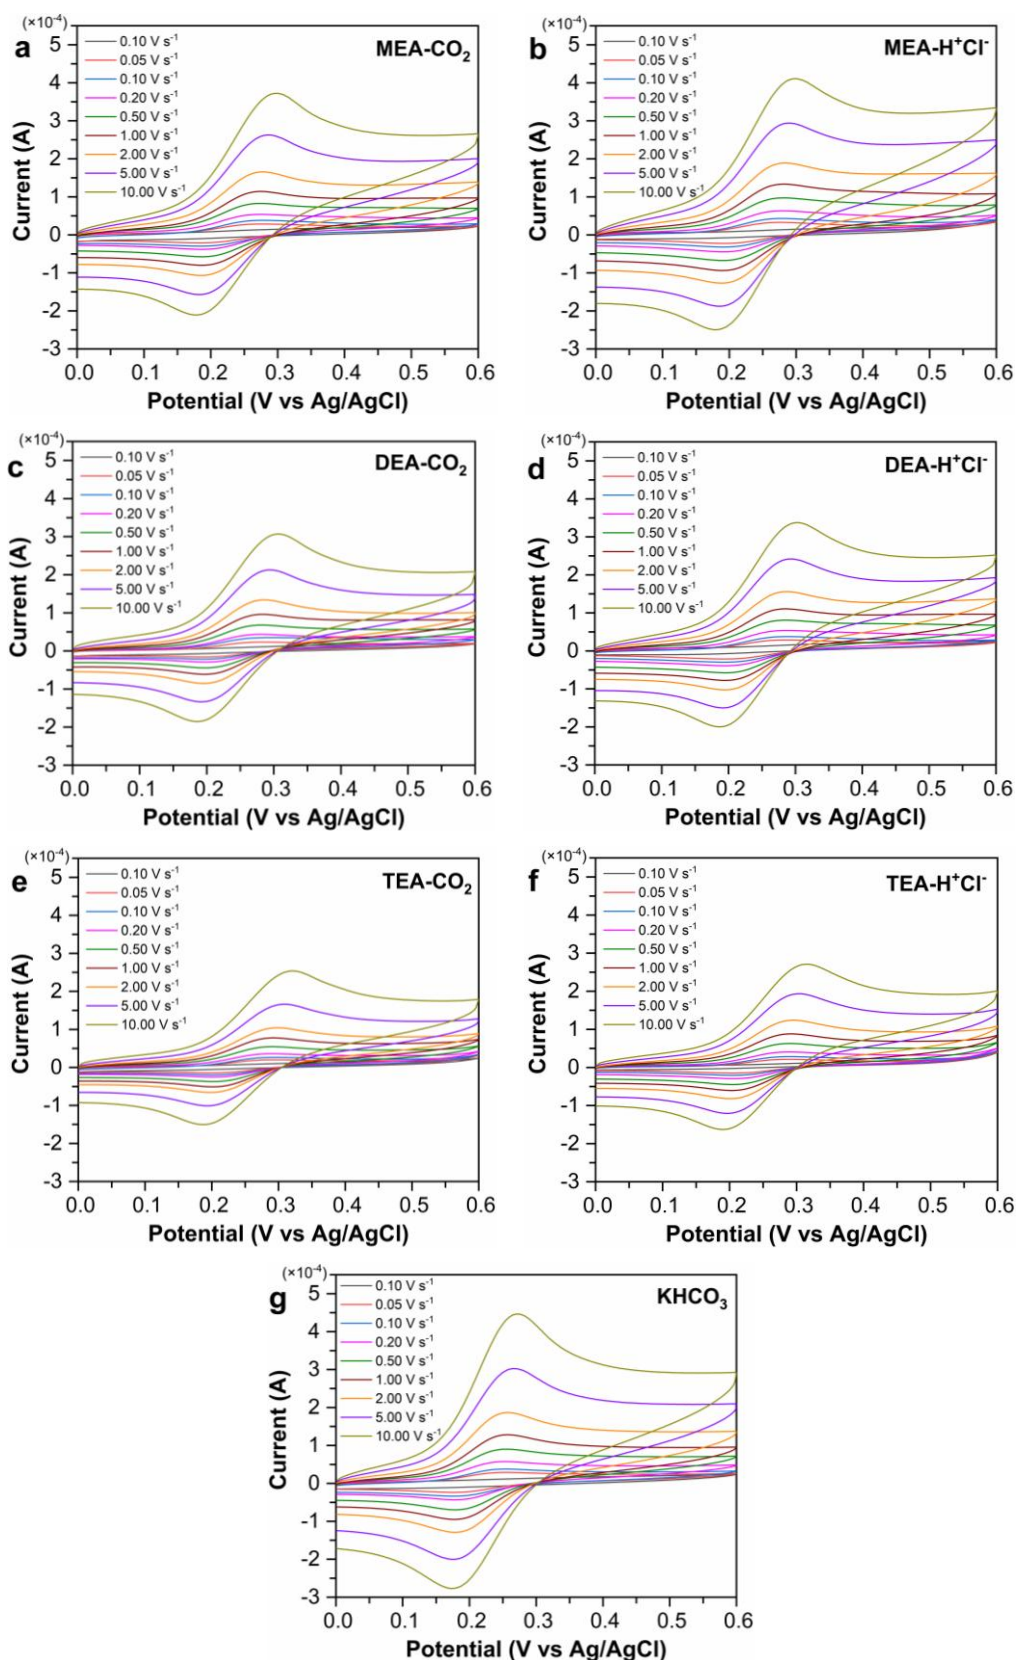

**Figure S8.** Cyclic voltammograms recorded in (a,c,e) CO<sub>2</sub>-loaded 2 M amine solutions, (b,d,f) ammonium chloride solutions of the corresponding amines, and (g) 2 M KHCO<sub>3</sub> solution at different scan rates.

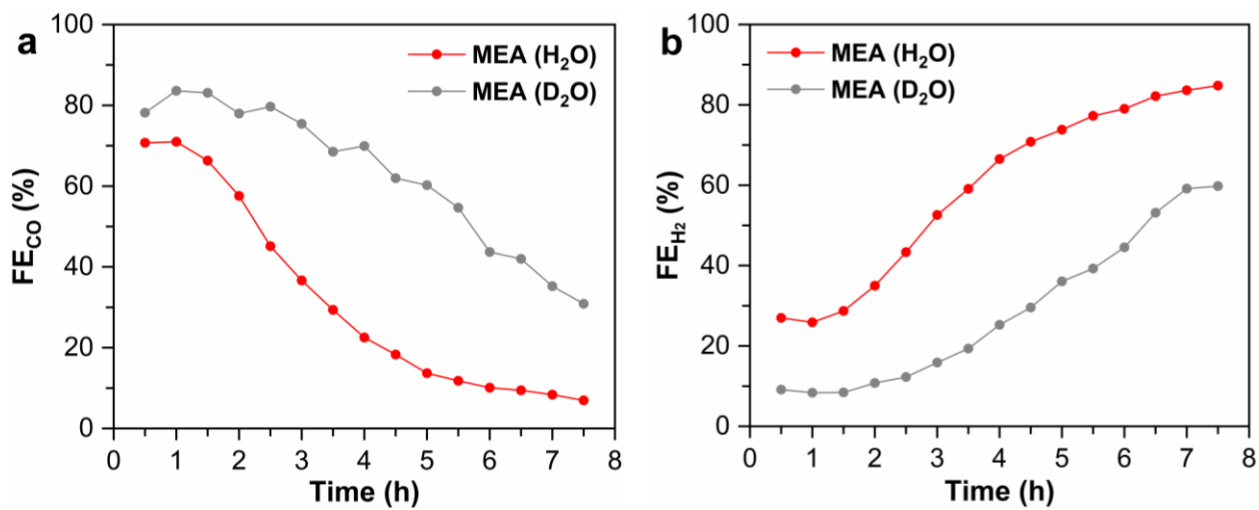

**Figure S9.** (a) FE<sub>CO</sub> and (b) FE<sub>H<sub>2</sub></sub> recorded for the prolonged electrolysis of captured CO<sub>2</sub> in 2 M MEA at -0.85 V vs RHE using CoPc/CB catalyst and H<sub>2</sub>O or D<sub>2</sub>O as solvent.

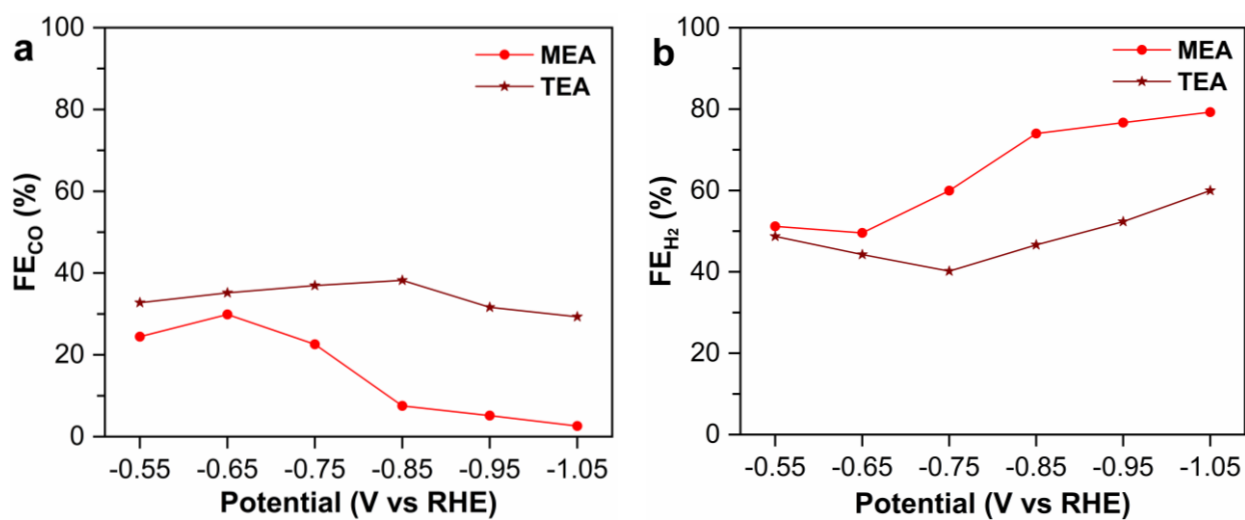

**Figure S10.** (a) FE<sub>CO</sub> and (b) FE<sub>H<sub>2</sub></sub> recorded for the electrolysis of captured CO<sub>2</sub> in 2 M MEA and TEA solutions using Ni-N-C catalyst.

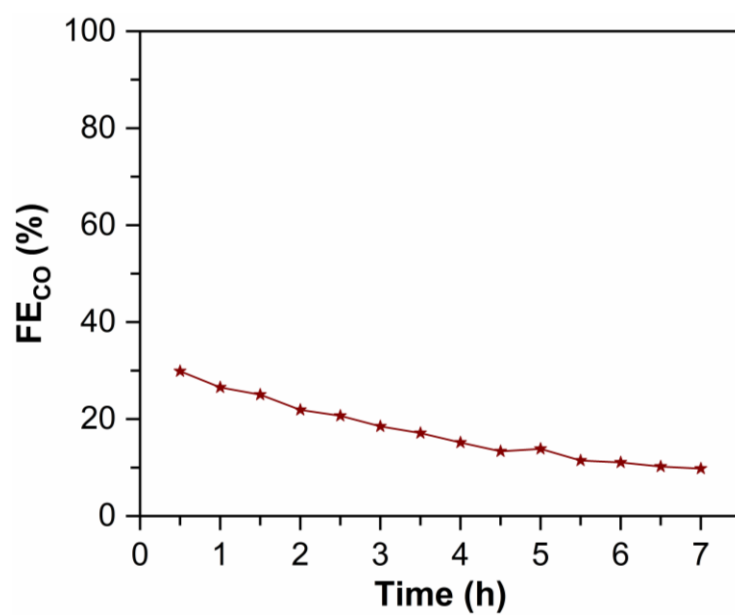

**Figure S11.** FE<sub>CO</sub> recorded for the prolonged electrolysis of captured CO<sub>2</sub> in 2 M TEA solution at  $-0.85$  V vs RHE using Ni-N-C catalyst.

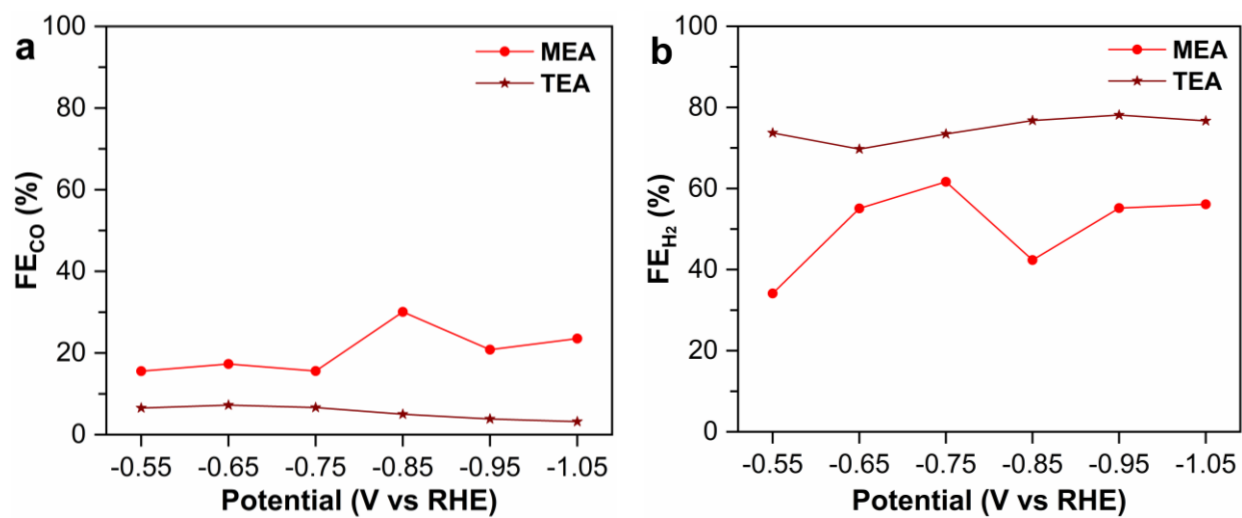

**Figure S12.** (a) FE<sub>CO</sub> and (b) FE<sub>H2</sub> recorded for the electrolysis of captured CO<sub>2</sub> in 2 M MEA and TEA solutions using Ag catalyst.

**Table S1.** The pH values of various amine solutions.

| Amine solutions                           | pH    |
|-------------------------------------------|-------|
| 2 M MEA                                   | 12.04 |
| CO <sub>2</sub> -loaded 2 M MEA           | 7.45  |
| Ar-purged CO <sub>2</sub> -loaded 2 M MEA | 7.64  |
| 2 M DEA                                   | 11.55 |
| CO <sub>2</sub> -loaded 2 M DEA           | 7.53  |
| Ar-purged CO <sub>2</sub> -loaded 2 M DEA | 7.76  |
| 2 M TEA                                   | 10.93 |
| CO <sub>2</sub> -loaded 2 M TEA           | 7.53  |
| Ar-purged CO <sub>2</sub> -loaded 2 M TEA | 7.71  |

**Table S2.** Performance comparison for electrochemical conversion of captured CO<sub>2</sub> in various amine solutions within an H-cell.

| Catalyst                  | Electrolyte<br>(pH)                                                        | FE <sub>CO</sub> <sup>a</sup><br>(%) | j  <sup>b</sup><br>(mA cm <sup>-2</sup> ) | Potential <sup>c</sup>      | Ref.         |
|---------------------------|----------------------------------------------------------------------------|--------------------------------------|-------------------------------------------|-----------------------------|--------------|
| CoPc/CB                   | Ar-purged CO <sub>2</sub> -loaded 2 M<br>MEA (7.64)                        | 69                                   | 12.2                                      | -0.95 V vs RHE              | This<br>work |
|                           | Ar-purged CO <sub>2</sub> -loaded 2 M<br>DEA (7.76)                        | 76                                   | 7.5                                       | -0.85 V vs RHE              |              |
|                           | Ar-purged CO <sub>2</sub> -loaded 2 M<br>TEA (7.71)                        | 80                                   | 4.5                                       | -0.85 V vs RHE              |              |
| Ag                        | N <sub>2</sub> -purged CO <sub>2</sub> -loaded 2 M<br>MEA + 3 M KCl (8.3)  | 38                                   | N. A.                                     | -0.66 V vs RHE              | S1           |
| Ag                        | N <sub>2</sub> -purged CO <sub>2</sub> -loaded 2 M<br>KCl + 2 M MEA (7.6)  | 19                                   | 30                                        | -0.85 V vs RHE <sup>d</sup> | S2           |
| Ni-N/C                    | Ar-purged CO <sub>2</sub> -loaded 1 M<br>MEA (pH not reported)             | 78                                   | 1.7 <sup>e</sup>                          | -0.58 V vs RHE              | S3           |
|                           | Ar-purged CO <sub>2</sub> -loaded 1 M<br>DEA (pH not reported)             | 65                                   | 1.5 <sup>e</sup>                          | -0.64 V vs RHE              |              |
| Ni(cyclam)Cl <sub>2</sub> | Ar-purged CO <sub>2</sub> -loaded 0.1 M<br>MEA + 0.05 M phosphate<br>(7.9) | 77                                   | 1.41                                      | -0.74 V vs RHE <sup>d</sup> | S4           |
|                           | Ar-purged CO <sub>2</sub> -loaded 0.1 M<br>DEA + 0.05 M phosphate<br>(8.0) | 41                                   | 1.42                                      | -0.74 V vs RHE <sup>d</sup> |              |

<sup>a</sup> Maximum FE<sub>CO</sub> under reported conditions. <sup>b</sup> Current density achieved at the listed potential. <sup>c</sup> The electrolysis potential at which the maximum FE<sub>CO</sub> achieved. <sup>d</sup> Potentials converted from reported potentials against SHE or Ag/AgCl according to the pH of electrolyte in the reference. <sup>e</sup> |j| calculated from the reported |j<sub>CO</sub>| and FE<sub>CO</sub> in the reference. N. A. denotes data not available.

**Table S3.** The coefficients of viscosity for different CO<sub>2</sub>-loaded amine solutions.

| Electrolyte                     | Coefficient of viscosity (mPa·s) |
|---------------------------------|----------------------------------|
| CO <sub>2</sub> -loaded 1 M MEA | 1.0                              |
| CO <sub>2</sub> -loaded 2 M MEA | 1.1                              |
| CO <sub>2</sub> -loaded 5 M MEA | 2.0                              |
| CO <sub>2</sub> -loaded 2 M DEA | 1.4                              |
| CO <sub>2</sub> -loaded 2 M TEA | 1.8                              |

## References

- S1. G. Lee, Y. C. Li, J.-Y. Kim, T. Peng, D.-H. Nam, A. Sedighian Rasouli, F. Li, M. Luo, A. H. Ip, Y.-C. Joo and E. H. Sargent, Electrochemical upgrade of CO<sub>2</sub> from amine capture solution, *Nat. Energy*, 2020, **6**, 46-53.
- S2. G. Leverick, E. M. Bernhardt, A. I. Ismail, J. H. Law, A. Arifutzzaman, M. K. Aroua and B. M. Gallant, Uncovering the active species in amine-mediated CO<sub>2</sub> reduction to CO on Ag, *ACS Catal.*, 2023, **13**, 12322-12337.
- S3. J. H. Kim, H. Jang, G. Bak, W. Choi, H. Yun, E. Lee, D. Kim, J. Kim, S. Y. Lee and Y. J. Hwang, The insensitive cation effect on a single atom Ni catalyst allows selective electrochemical conversion of captured CO<sub>2</sub> in universal media, *Energy Environ. Sci.*, 2022, **15**, 4301-4312.
- S4. A. Q. Mir, A. Banerjee, F. Ihiri, S. Chiu, A. N. Alexandrova, C. Morales-Guio and J. Y. Yang, Optimizing CO<sub>2</sub>-Loaded Aqueous Amine Solutions for Higher Electrocatalytic CO<sub>2</sub> Reduction Activity, *J. Am. Chem. Soc.*, 2025, **147**, 39123-39133.
